# Supplementary material
Source: PubMed Central journal article supplement (PMC3236244)
Supplement: NIHMS295661-supplement-1_si_001.pdf [file NIHMS295661-supplement-1_si_001.pdf]

# Supporting Information

## Top-gated CVD Graphene Transistors with Current Saturation

Jingwei Bai,<sup>†</sup> Lei Liao,<sup>‡</sup> Hailong Zhou,<sup>‡</sup> Rui Cheng,<sup>†</sup> Lixin Liu,<sup>‡</sup> Yu Huang,<sup>†&\*</sup> Xiangfeng Duan<sup>‡&\*</sup>

<sup>†</sup>Department of Materials Science and Engineering, University of California, Los Angeles, CA 90095

<sup>‡</sup>Department of Chemistry and Biochemistry, University of California, Los Angeles, CA 90095

<sup>&</sup>California Nanosystems Institute, University of California, Los Angeles, CA 90095

RECEIVED DATE ( )

\*To whom correspondence should be addressed. E-mail: [xduan@chem.ucla.edu](mailto:xduan@chem.ucla.edu), [yhuang@seas.ucla.edu](mailto:yhuang@seas.ucla.edu).

### 1. CVD graphene growth and transfer method

The growth of graphene is based on the ambient pressure CVD method reported previously by Bhaviripudi *et al.*<sup>1</sup> Generally, the graphene was grown on Cu foil at 1050 °C with methane as the precursor. At first, Cu foils (25 μm thick) is placed into 1 inch quartz tube without pretreatment. The tube is pumped and purged with H<sub>2</sub>/Ar (5:95) for three times in order to eliminate oxygen. The furnace is then allowed to heat up to 1080 °C with H<sub>2</sub>/Ar flow (25 sccm/475 sccm) to anneal the Cu foil for 90 minutes. After annealing, the temperature is dropped to 1050 °C in 10 minutes. The graphene growth starts with the flow of methane (500 ppm methane in Ar, 35 sccm) with reduction of the H<sub>2</sub>/Ar flow to 25 sccm/440 sccm. The growth process lasts for 3 hours and stops by fast pulling the tube out of the furnace.

After growth, the graphene is transferred onto silicon/silicon oxide substrate for characterization and device fabrication. Initially, the graphene is grown on both side of the copper

foil. To transfer the graphene, we first spin coat a layer of PMMA (495 PMMA C2, MicroChem) film onto one side of the graphene/Cu foil and clean the other side with O<sub>2</sub> plasma. The copper is then etched away using copper etchant (Transene, CE-100) by floating the foil on the surface of the etchant bath. The PMMA/graphene film is washed with HCl/H<sub>2</sub>O (1:10) and DI water for several times, and transferred onto silicon/silicon oxide substrate. After drying the substrate in vacuum, a small droplet of PMMA is dropped on the substrate to partially dissolve the dried PMMA, and dried in atmosphere. This process is reported to release stress of the graphene/substrate contact.<sup>2</sup> Finally, the PMMA is dissolved in acetone for 2 hours. The graphene quality is characterized with Raman spectroscopy, showing single layer nature and good film quality (Figure S1).

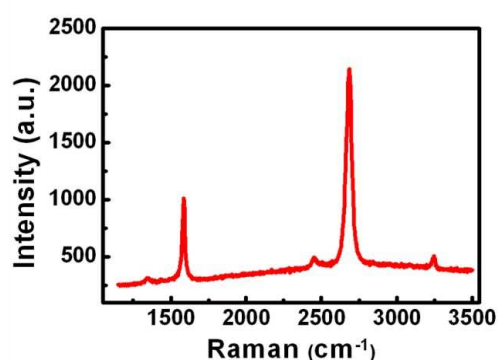

Figure S1. Typical Raman spectroscopy of CVD grown graphene.

## 2. Characterization of evaporated HfO<sub>2</sub>:

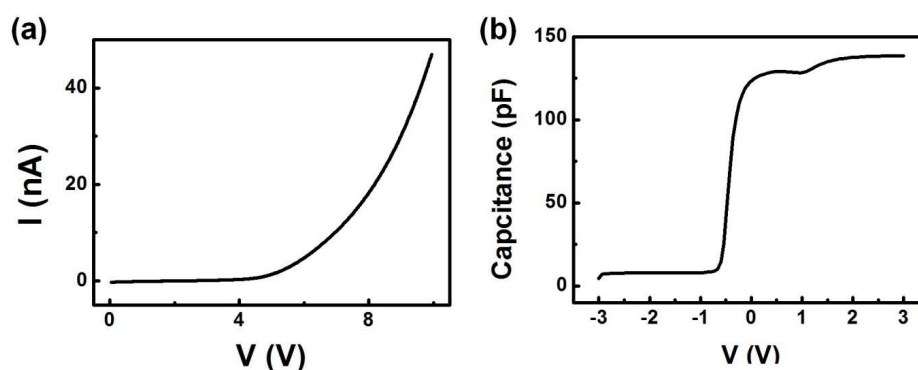

Figure S2. (a) Leakage current and (b) capacitance measurement of a metal-insulator-semiconductor device with 50 nm HfO<sub>2</sub> on n-type Si substrate. The device area is 200 μm×200 μm.

## 3. Conductance of 5.6μm channel device.

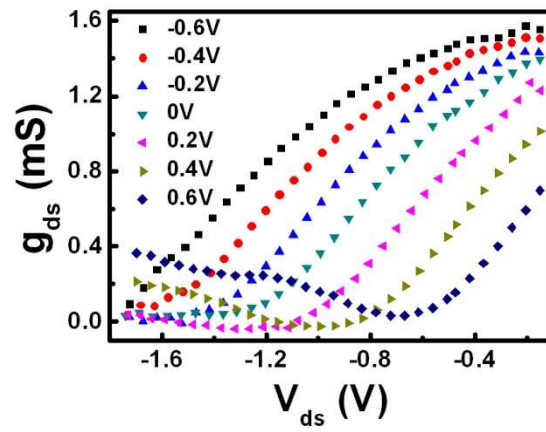

Figure S3. Drain conductance as a function of  $V_{ds}$  at different gate voltage showing full current saturation in the device with gate length of  $5.6 \mu\text{m}$ .

Reference:

1. Bhaviripudi, S.; Jia, X. T.; Dresselhaus, M. S., and Kong, J. *Nano Lett.* **2010**, 10, 4128-4133.
2. Li, X. S. *et al. Nano Lett.* **2009**, 9, 4359-4363.
